# Supplementary material for: Genomic epidemiology of the SARS-CoV-2 epidemic in Brazil
Source: PubMed Central journal article supplement (PMC9417986; doi:10.1038/s41564-022-01191-z), 2022-08-18

**Supplementary information**

---

**Genomic epidemiology of the SARS-CoV-2 epidemic in Brazil**

---

In the format provided by the authors and unedited

Supplementary figure 1.

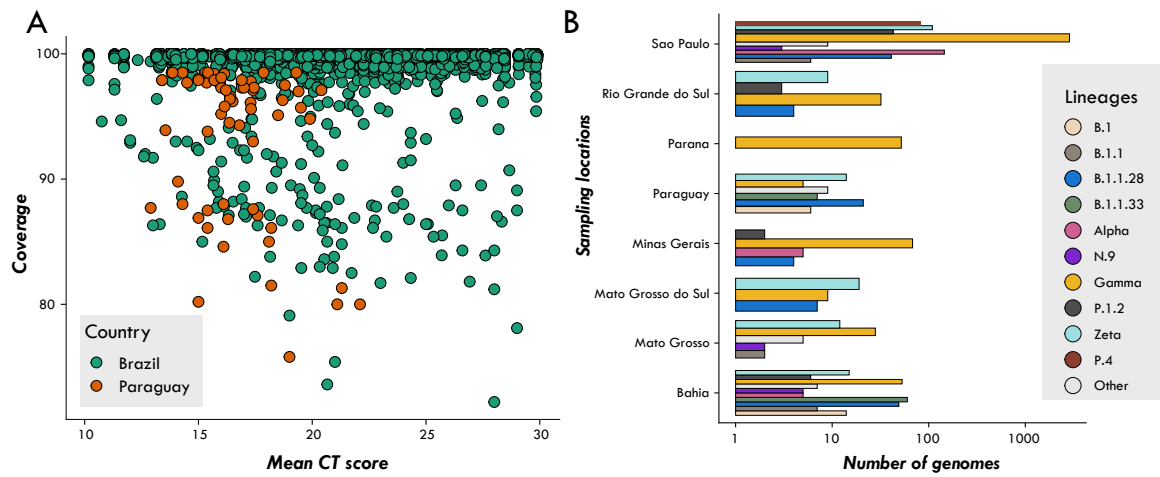

Supplementary figure 2.

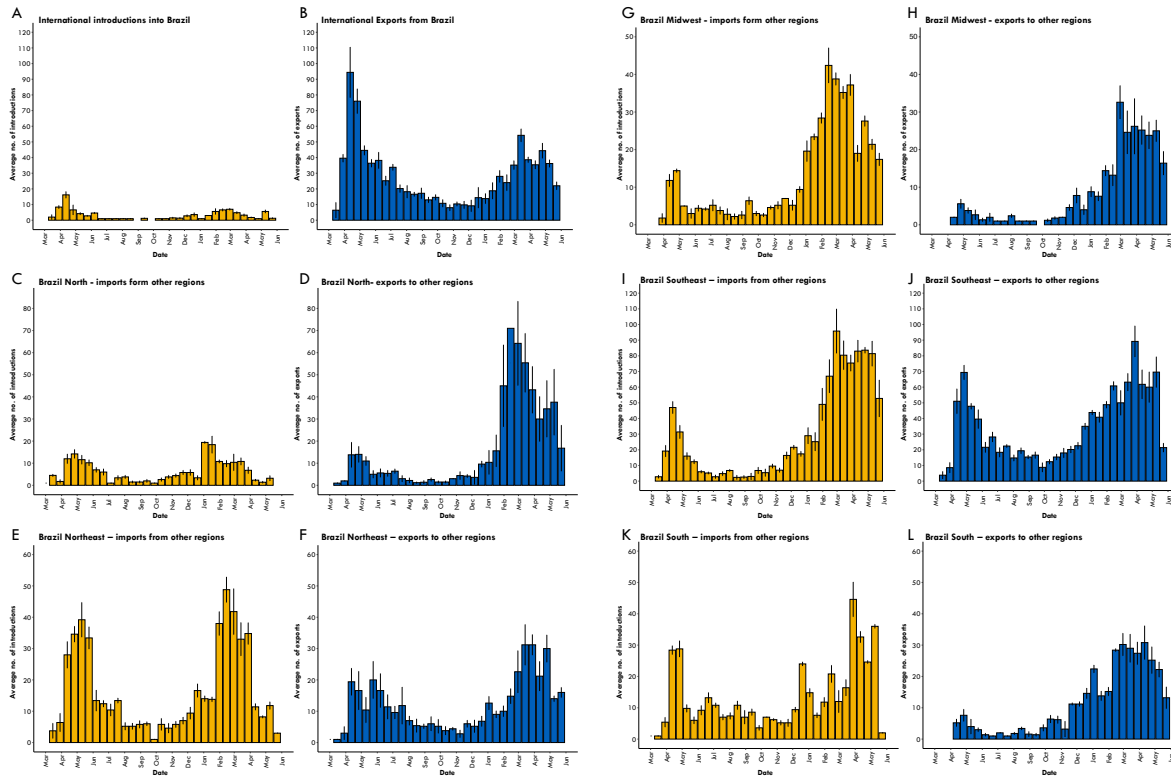

### Supplementary figure 3.

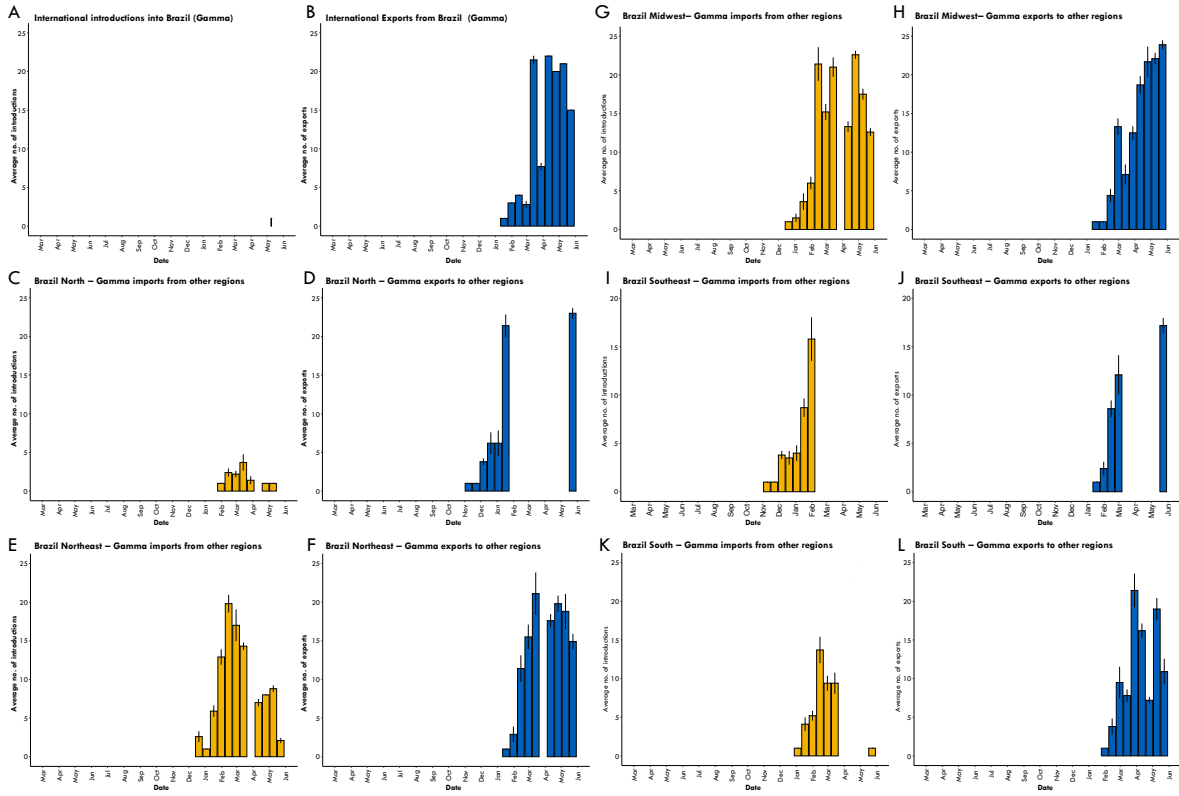

### Supplementary figure 4.

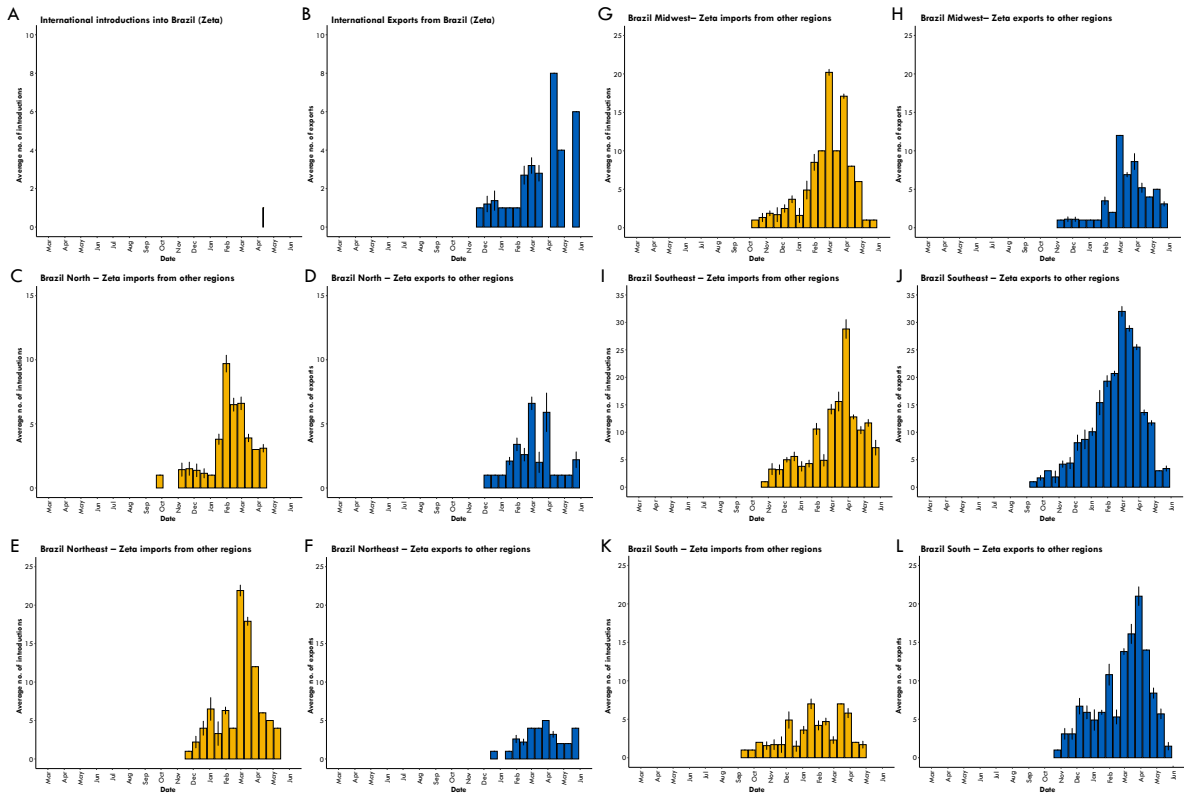

## Supplementary figure 5.

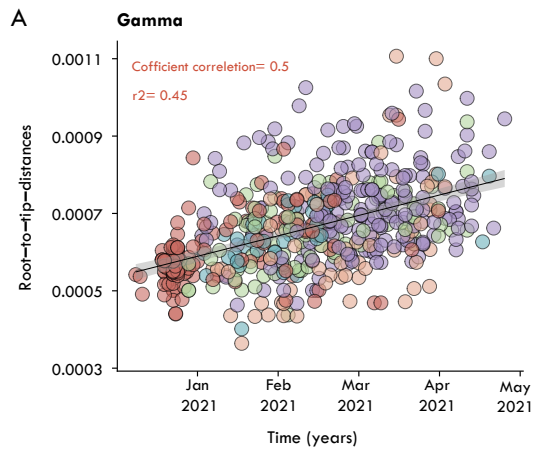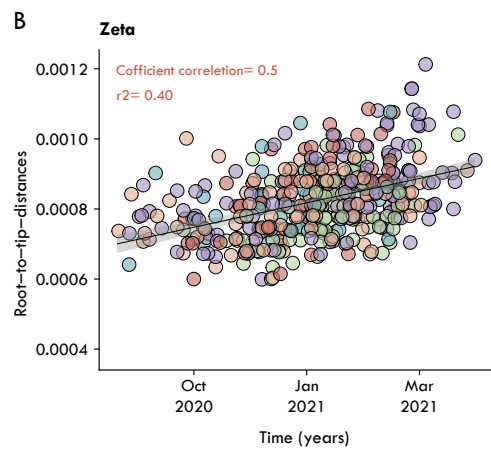

Supplement: 41564_2022_1191_MOESM1_ESM.pdf [file 41564_2022_1191_MOESM1_ESM.pdf]
